1 **Influences on policy-formulation, decision-making, organisation and management for maternal,**  
2 **newborn and child health in Bangladesh, Ethiopia, Malawi and Uganda: the roles and legitimacy**  
3 **of a multi-country network**

4  
5 **Authors:** Kohenour Akter<sup>1</sup>, Yusra Ribhi Shawar<sup>2,3</sup>, Anene Tesfa<sup>4</sup>, Callie Daniels-Howell<sup>5</sup>, Gloria Seruwagi<sup>6</sup>,  
6 Agnes Kyamulabi<sup>6</sup>, Albert Dube<sup>7</sup>, Geremew Gonfa<sup>4</sup>, Kasonde Mwaba<sup>5</sup>, QCN Evaluation Group, Mary Kinney<sup>8</sup>,  
7 Mike English<sup>9</sup>, Jeremy Shiffman<sup>2,3</sup>, Nehla Djellouli<sup>5</sup>, Tim Colbourn<sup>5</sup>

8  
9 **Affiliation(s)**

10 <sup>1</sup> Perinatal Care Project, Diabetic Association of Bangladesh, Dhaka, Bangladesh.

11 <sup>2</sup> Bloomberg School of Public Health, John Hopkins University, Baltimore, USA

12 <sup>3</sup> Paul H. Nitze School of Advanced International Studies, John Hopkins University, Washington D.C., USA

13 <sup>4</sup> Ethiopian Public Health Institute, Addis Ababa, Ethiopia.

14 <sup>5</sup> Institute for Global Health, University College London, London, UK.

15 <sup>6</sup> School of Public Health, Makerere University, Kampala, Uganda.

16 <sup>7</sup> Parent And Child Health Initiative PACHI, Lilongwe, Malawi.

17 <sup>8</sup> School of Public Health, University of the Western Cape, Cape Town, South Africa.

18 <sup>9</sup> Centre for Tropical Medicine and Global Health, University of Oxford, Oxford, UK.

19  
20  
21 \* Corresponding author: Tim Colbourn, Institute for Global Health, University College London, London, UK,

22 email: [t.colbourn@ucl.ac.uk](mailto:t.colbourn@ucl.ac.uk) and, Kohenour Akter, Perinatal Care Project, Diabetic Association of

23 Bangladesh, Dhaka, Bangladesh, email: mary05kh@gmail.com

24

## 25 **Abstract**

26 The Network for Improving Quality of Care for Maternal, Newborn and Child Health (QCN) is intended to  
27 facilitate learning, action, leadership and accountability for improving quality of care in member countries.

28 This requires legitimacy—a network’s right to exert power within national contexts. This is reflected, for  
29 example, in a government’s buy-in and perceived ownership of the work of the network.

30 During 2019– 2022 we conducted iterative rounds of stakeholder interviews, observations of meetings,  
31 document review, and hospital observations in Bangladesh, Ethiopia, Malawi, Uganda and at the global level.

32 We developed a framework drawing on three frameworks: Tallberg and Zurn which conceptualizes legitimacy  
33 of international organisations dependent on their features, the legitimation process and beliefs of audiences;

34 Nasiritousi and Faber, which looks at legitimacy in terms of problem, purpose, procedure, and performance  
35 of institutions; Sanderink and Nasiritousi, to characterize networks in terms of political, normative and

36 cognitive interactions. We used thematic analysis to characterize, compare and contrast institutional  
37 interactions in a cross-case synthesis to determine salient features.

38 Political and normative interactions were favourable within and between countries and at global level since  
39 collective decisions, collaborative efforts, and commitment to QCN goals were observed at all levels. Sharing

40 resources and common principles were not common between network countries, indicating limits of the  
41 network. Cognitive interactions—those related to information sharing and transfer of ideas— were more

42 challenging, with the bi-directional transfer, synthesis and harmonization of concepts and methods, being  
43 largely absent among and within countries. These may be required for increasing government ownership of

44 QCN work, the embeddedness of the network, and its legitimacy.

45 While we find evidence supporting the legitimacy of QCN from the perspective of country governments,  
46 further work and time are required for governments to own and embed the work of QCN in routine care.

47

48 **Keywords:** legitimacy, ownership, embeddedness, power, institutional interaction, quality of care network  
49 (QCN).

50

## 51 **Introduction**

52 The Network for Improving Quality of Care for Maternal, Newborn and Child Health (QCN) [1] was created to  
53 reduce maternal, newborn and child health morbidity and mortality by improving quality of care. QCN was  
54 intended to facilitate learning, action, leadership and accountability for improving quality of care in member  
55 countries [2].

56

57 For the network to work as intended the government of each member country must buy into the idea and  
58 spend time and resources on network activities and coordination [2]. Each member country therefore must  
59 recognise the legitimacy of the network and take sufficient ownership of the required policy and  
60 management activities. In this paper, legitimacy is understood as ‘the right to exert power’[3]. This right can  
61 be understood both in a normative and empirical sense. The former, from the perspective of democratic  
62 theory questions if an actor has a right to exert power, i.e., is it representative of constituent interests and/or  
63 historically effective in meeting those interests? The latter examines an actor’s perceived right to exert power  
64 from the perspective of a particular actor. Previous work on international organisations, primarily from the  
65 perspective of the public, indicates that social trust, democratic organisation, and how these are influenced  
66 by prior communication and beliefs compatible with the mission and values of the initiative are likely to foster  
67 legitimacy, and the absence of these make an initiative or actors less likely to be seen as legitimate [4-7].  
68 Work on the legitimacy of organisations from the perspective of expert stakeholders found an organisations  
69 performance, their purpose and procedure to all drive legitimacy [8]. These factors, and especially

70 performance, explained perceptions of effectiveness and confidence in organisations as well [8], aligning with  
71 the findings on the role of trust, democracy, and communication and belief in increasing legitimacy.

72

73 In this paper, we examine QCN's legitimacy in advancing policy and improving services—from the perspective  
74 of QCN country teams and in particular the national governments departments that led them— across four  
75 of the involved countries: Bangladesh, Ethiopia, Malawi, and Uganda. Specifically, we investigate QCN's  
76 legitimacy by analysing the nature of the interactions across global, national, and local network actors  
77 engaged in QCN. Consequent to QCN's legitimacy we also investigate the ownership and direction of  
78 strategies adopted in each country, and how embedded the work of the network is in the health system  
79 (routine care) of each country [9]. We consider the context of each country in our investigations.

80 This paper on network legitimacy and ownership is part of a series of papers evaluating the QCN and  
81 complements our papers on network emergence [10] and network effectiveness [11] [additional file: 2-page  
82 summary explaining collection of QCN papers]. Following the emergence of the network at global and  
83 national levels [10] this paper looks at interactions between the institutions involved in each country, and  
84 the global level, which is key to understanding network effectiveness, as well as specific aspects of the work  
85 of the network such as innovation, sharing and learning [12] and our stakeholder network analysis [13],  
86 looking at interactions between QCN actors from a quantitative perspective. Understanding the factors  
87 shaping legitimacy of QCN is important both for understanding the emergence and effectiveness of QCN, and  
88 for the success of future multilateral international efforts that bring governments and multiple stakeholders  
89 together to improve health systems and quality of care, and for work on other initiatives more broadly.

90

## 91 **Methods**

92 QCN emerged during 2017-2019, involving 11 countries, and was disrupted by the COVID-19 pandemic [10].

93 Our study was carried out at national and local levels in Bangladesh, Ethiopia, Malawi and Uganda as well as

94 at the global level of QCN. We chose these four countries as case studies as they represent a range of  
95 maternal, newborn and child health contexts and prior histories with quality improvement efforts. Our study  
96 is qualitative research, and involved, over three years (2019-2022) an iterative series of interviews of key  
97 stakeholders, observations of meetings at local and national levels, document review and hospital  
98 observations. The iterative nature of our work, which included follow-up interviews of many respondents  
99 over several years during the evolution of QCN, with accordingly iteratively revised interview topic guides,  
100 enabled us to investigate how institutional interactions and consequent legitimacy and embeddedness of the  
101 network changed over time, up until 2022. The COVID-19 pandemic also disrupted our research, though like  
102 QCN itself, some work, such as interviews, moved online [14]. Please see supplementary material [common  
103 methods document] for details of all data collection methods and how this study is linked to the wider  
104 evaluation of the QCN we undertook. Here we focus on the framework and theories we use and our analytical  
105 methods for this paper.

106

## 107 ***Legitimacy frameworks***

108 To guide our analysis, we developed a framework (Figure 1) drawing on three relevant frameworks. First that  
109 by Tallberg and Zurn [4] which conceptualizes legitimacy of international organisations as being dependent  
110 on their features (authority, procedure, performance), the legitimation process (intensity, tone, narrative),  
111 and legitimacy beliefs of audiences (constituents and observers). Second, by Nasiritousi and Faber [8], which  
112 looks at legitimacy in terms of the focus of institutions on a problem, looking at purpose, procedure, and  
113 performance of institutions. We use this to consider how the history of work on quality improvement in each  
114 country by the institutions involved in QCN relates to observed legitimacy, ownership and embeddedness of  
115 QCN in the country. Third, a framework developed by Sanderink and Nasiritousi [15] to characterize networks  
116 in terms of perceived institutional interactions. This divides institutional interactions into political, normative,  
117 cognitive, behavioural and ‘impact level’ interactions. We focused on three of these interactions, political,

118 normative and cognitive (Figure 1) to investigate the legitimacy and ownership of the work of the network in  
119 each case study country, looking at the extent to which different organisations involved in the network work  
120 together across these three dimensions. Political interactions are those related to joint decision making and  
121 collaboration; normative interactions are those related to shared principles, norms and commitments; and  
122 cognitive interactions are those related to information sharing and transfer of ideas [15]. We do not focus on  
123 behavioural or impact level interactions as behavioural change and impact are difficult to measure and are  
124 concerned with network effectiveness, the subject of another of our papers [11].

125  
126 Institutional interactions may also be shaped by power relations between institutions, which may be  
127 dependent on the capacity of each institution [16, 17], e.g., institutions with greater capacity have more  
128 power to form policies and influence decisions and ways of working of other organisations. In our  
129 examination of interactions between institutions we also consider the nature of institutional agency and  
130 power in relation to structure, by considering distribution of financial and economic resources, organisational  
131 culture and ways of working, alignment of goals between actors, leverage via other agreements and  
132 influences and political stability (Figure 1).

133  
134 We consider the history of quality improvement efforts in each country in relation to the formation of the  
135 network and wider context of maternal, newborn and child health programmes in detail in supplementary  
136 material common to all papers in our QCN evaluation series [common country context document]. In this  
137 paper we extract the most relevant aspects of this background information explaining the role of institutions  
138 involved in QCN at the beginning of our results section and follow with the results of our analysis of  
139 institutional interactions, legitimacy and ownership of the work of the network described above.

140

141 **Fig 1. Framework describing drivers of legitimacy and ownership of the work of Quality of Care Network**  
142 **(QCN) from the perspective of national governments leading the work of QCN**

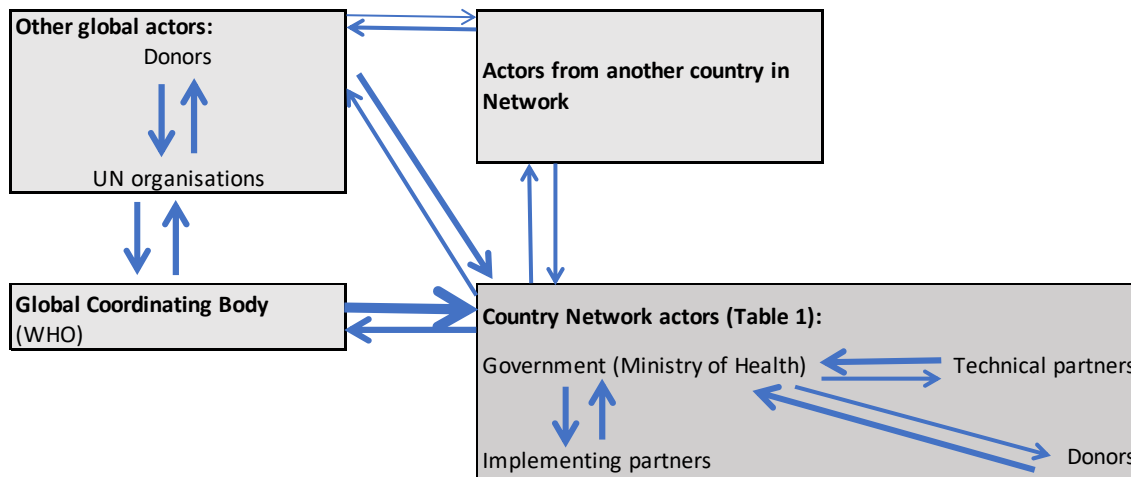

Arrows represent Institutional Interactions, including: [Sanderink & Nasiritousi \[5\]](#)

- Political Interactions
- Normative Interactions
- Cognitive Interactions

**Extent of influence of each body and actor (width of arrow) will depend on:**

- Capacity [see Wu et al, ref [XX](#), Paper 6, ref [XX](#)] e.g. Human resources available in country to draft policy and programmes, organise activities, analyse and evaluate processes and outcomes
- Alignment of goals between actors (**beliefs**, organisational **purpose**)
- Leverage (**authority**) via other agreements and influences, and **procedures**
- Organisational culture and wider cultures
- Political stability
- **Performance** of organisations

[Nasiritousi & Faber \[6\]](#)

[Tallberg & Zurn \[Ref X\]](#)

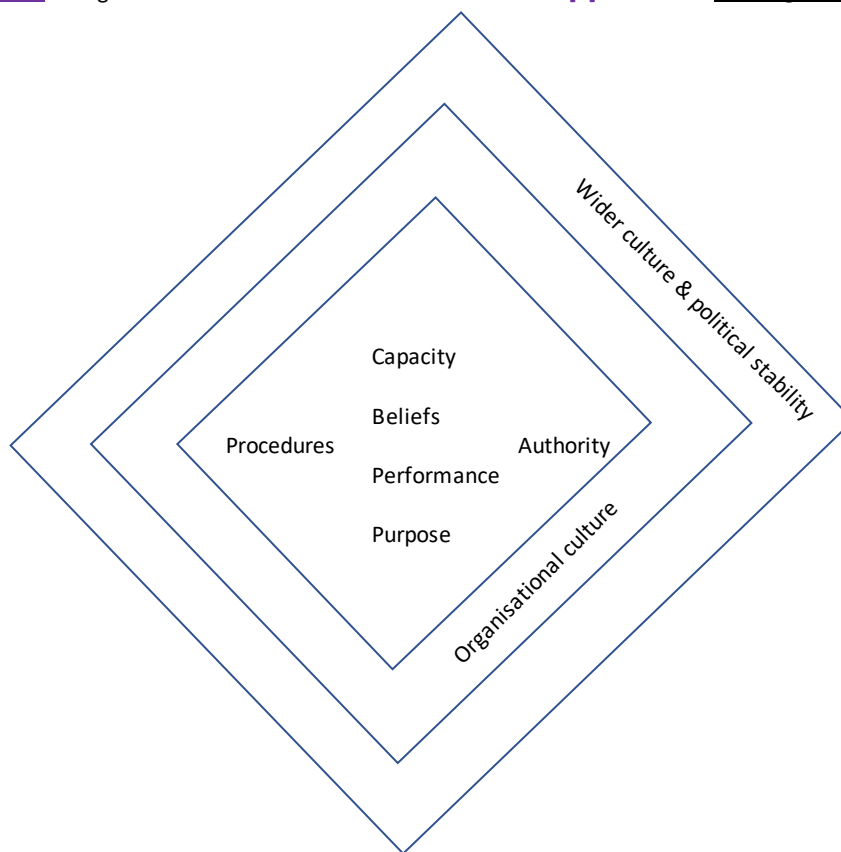



## 144 *Analysis*

145 We used thematic analysis [18] of interview transcripts and process tracing [19] using interview data, review  
146 of key documents and observations of meetings to characterise political, normative and cognitive  
147 interactions between institutions involved in QCN in each country. We compared and contrasted these  
148 interactions in a cross-case synthesis to determine salient features of these institutional interactions in order  
149 to evaluate the legitimacy of the network and ownership and embeddedness of the work of the network in  
150 each country, and which contextual factors they depend on, to answer our research question.

151

## 152 *Ethics*

153 Ethical approval was received from University College London Research Ethics Committee (ref: 3433/003);  
154 BADAS Ethical Review Committee (ref: BADAS-ERC/EC/19/00274), Ethiopian Public Health Institute  
155 Institutional Review Board (ref: EPHI-IRB-240-2020), National Health Sciences Research Committee in Malawi  
156 (ref: 19/03/2264) and Makerere University Institutional Review Board (ref: Protocol 869). The conduct of the  
157 evaluation was based on clear ethical standards which assured confidentiality, privacy, anonymity and  
158 informed consent. All respondents provided verbal or written informed consent. All respondents were  
159 informed of: (i) the purpose of the evaluation; (ii) their right to refuse to participate; and (iii) that their  
160 possible decision not to participate would not be held against them or affect their status in the network.

161

## 162 **Results**

163 In examining QCN's legitimacy, we first summarize key contextual information concerning the roles of each  
164 network partner institution in each of the country cases; further details on QCN's emergence in each of the  
165 countries, as well as their histories concerning quality improvement and MNCH initiatives are provided in

166 Shawar *et al* [10] and the supplementary material [common country context document]. We then discuss the  
167 political, normative and cognitive interactions between involved actors.

168

## 169 ***Bangladesh***

170 Bangladesh's work on and government commitment to quality improvement long pre-dates the  
171 establishment of QCN. In terms of government commitment, the Quality Improvement Secretariat (QIS),  
172 established by the Ministry of Health and Family Welfare (MoH&FW) in January 2015, supports quality  
173 improvement (QI) initiatives across the country and strengthens and coordinates QI activities in the public  
174 and private health sector. QCN was integrated into QIS. In addition to QIS, there were several development  
175 partners that have long worked on quality improvement in the country, including WHO, UNICEF, USAID and  
176 Save the Children. UNICEF worked in partnership with the Bill and Melinda Gates Foundation and the Ministry  
177 of Health (MoH) since 2015 to demonstrate a model of quality of care to scale up at national level via its Every  
178 Mother, Every Newborn (EMEN) pilot project in Kurigram (one of the northern districts in Bangladesh) [20].  
179 Save the Children is a key implementer of USAID's Mamoni Maternal, newborn and child health strengthening  
180 project (MNCSP), a flagship activity to support the Bangladeshi Maternal and Newborn Health program,  
181 started in 2018 [21]. These actors collectively engaged in the establishment and implementation of QCN  
182 activities. Other actors, that did not appear to interact directly with QCN but contributed to QI  
183 implementation processes included UNFPA, the National Institute for Preventative and Social Medicine  
184 (NIPSOM) and district-level Civil Surgeons. NIPSOM is a government academic institution invited by UNICEF  
185 to play the role of national learning hub. NIPSOM was also working as implementing partner with UNICEF's  
186 support, and participated to train and coach facility health workers. URC from the global level also worked to  
187 train and coach health workers, especially during the initial stages of QCN, and sometimes via online sessions.  
188 The Civil Surgeon is the district head in health and implementing partners run the projects informing him of  
189 every detail. UNFPA works on Maternal and Perinatal Death Surveillance and Response (MPDSR) at the

190 national level along with other partners, but not part of QCN activities. Relevant departments of the  
191 Directorate General of Health Service (DGHS) and Directorate General of Family Planning (DGFP), also get  
192 involved by two partner organizations.

193

## 194 ***Ethiopia***

195 Ethiopia also had a history of MNCH and quality improvement initiatives prior to the introduction of QCN  
196 [2]. For example, in 2015, the government introduced the Health Sector Transformation Plan (HTSP), which  
197 sought to improve maternal and child health services. In 2016, the National Healthcare Quality Strategy  
198 (NHQS) was launched, followed by the establishment of quality units at federal, regional, district and facility  
199 levels. The country also had experience with similar network initiatives, including the Ethiopian Hospitals  
200 Alliance for Quality (EHAQ), initiated by MoH in 2012 [22]. In 2016, QCN was placed in the MoH, which  
201 played a leadership role in coordinating and providing technical support, coaching and mentoring for  
202 quality improvement activities. It established a technical working group (TWG) consisting of representatives  
203 of different partners and prepared a national roadmap called LALI (Leadership, Accountability, Learning,  
204 Implementation, alternatively used to LALA) [23] and identified learning facilities. QCN eventually became a  
205 country-led program, mainly coordinated by the MoH, with institutions, including international donors, and  
206 NGOs either funding or providing technical support at national level (for example WHO, UNICEF, USAID and  
207 UNFPA) or implementing the program at the facility level (these include IHI, Transform Primary Health Care  
208 Unit (Transform PHCU), Transform Health in Developing Regions (Transform HDR), CHAI, and WHO). WHO  
209 played a vital role in initiating, directing and coordinating the implementation together with MoH. WHO  
210 also provided technical and financial support for some of the local facilities, up until 2021 when WHO  
211 ceased their QCN activities in Ethiopia. It also served as a link to the WHO headquarters and the QCN at the  
212 global level. UNICEF and UNFPA play the role of financial partners.

213

## 214 ***Malawi***

215 In Malawi, QCN built on previous government and partner efforts to reduce maternal and newborn mortality  
216 as part of the MDGs/SDGs, as well as efforts towards achieving universal health coverage (UHC) and work  
217 done on HIV to trying to reduce mother-to-child transmission [24]. In November 2016, the government  
218 established the Quality Management Directorate (QMD) within the Ministry of Health, where QCN was  
219 placed. QMD aimed to contribute to improve health and client satisfaction via provision of quality health  
220 services and to drive the national agenda to improve quality and equity in the health sector in Malawi. After  
221 introducing the QCN to the MoH, the WHO assisted the Ministry in gathering key stakeholders, which formed  
222 a coordinating body (TWG) in charge of planning the implementation of QCN in the country. Other key  
223 stakeholders at the national level include the Reproductive Health Directorate (RHD) of the MoH, UNICEF,  
224 UNFPA and GIZ. RHD was a technical partner and worked with QMD in supporting and coordinating network  
225 efforts though they were less visible in QCN efforts over time. GIZ and UNICEF were playing the roles of  
226 implementation, technical and funding partners and also supported other community-based organizations  
227 (e.g. Society of Medical Doctors (SMD) and MaiKhanda) directly to implement QoC activities. UNFPA was  
228 providing technical assistance to develop policies and strategies, providing funding to RHD and QMD, and  
229 playing the role of an implementing partner. Other stakeholders who also played substantial roles at the  
230 national level include PACHA, NEST 360, ONSE, and Cowater where PACHA was playing both the role of  
231 technical and implementing partner and other organizations were working in implementation. JHPIEGO,  
232 CHAI, Save the Children and EGPAF assisted to review the roadmap.

233

## 234 ***Uganda***

235 QCN in Uganda built upon a long history of QI initiatives that remain ongoing, particularly those focused on  
236 HIV, reproductive health, and malaria. Previous QI initiatives in Uganda were Yellow Star and using the 5S's  
237 (sort, set, shine, standardize, and sustain) approach in HIV, TB and malaria, which established QI teams at  
238 each level of the health system as well as specific standards, indicators and databases. Uganda's commitment  
239 to improving MNCH was exhibited in its 2013 RMNCAH Sharpened Plan for Uganda, a national RMNCAH  
240 policy which set out to address existing bottlenecks to reduce MNC morbidity and mortality [25]; the updated  
241 plan in 2021, sought to especially focus on quality of care.

242  
243 QCN was originally co-led by the government's Quality Assurance Department and MCH department. QCN  
244 only began to flourish in 2019 after the renaming of the Quality Assurance Department to the Standards  
245 Compliance Accreditation Patient Protection (SCAPP) department under the Directorate of Governance and  
246 Regulation, and assigning it sole oversight and appointing a focal person for QCN, who brought more partners  
247 and funding on board. In this new arrangement, SCAPP would still work with the other departments but took  
248 responsibility for Network activities. In line with the country's decentralised health system regional quality  
249 improvement teams (QIT) were established, which aimed to lead and support district and health facility  
250 QITs. Several implementing partners played crucial roles in QCN in Uganda. The WHO introduced the QCN  
251 to the MoH and helped gather key stakeholders to form a TWG. Other key stakeholders in the country at the  
252 national level, included USAID, UNICEF, UNFPA. USAID worked through their partner organisations in Uganda:  
253 URC (previously) through Applying Science to Strengthen and Improve Systems (ASSIST) RHITES (North for  
254 Acholi region and East central for Busoga region), RHITES-Southwest/EGPAF, Save the Children and FHI  
255 (specifically under the MNCH/N activity). UNICEF and UNFPA also supported other organisations (CBOs) to  
256 directly implement QoC activities, e.g., AVSI and IntraHealth. Over the course of 2021, UNFPA increased its  
257 involvement with QCN and decided to formally enter the network rather than mirror its work independently.  
258 Other stakeholders who also played substantial roles at the national level were the Makerere University

259 School of Public Health as the designated learning partner on the Network, CHAI, JHPIEGO, and Ugandan  
260 professional associations including the Ugandan Paediatric Association and the Uganda Private Midwives  
261 Association. Another stakeholder playing a large role in the QCN in Uganda indirectly, was the World Bank  
262 through its GFF, which funded MOH's URMCHIP project, though it was not a direct QCN partner. Most  
263 involved partners requested to join the network themselves and were already Ministry partners on  
264 SRMNCAH issues.

265

### 266 ***QCN Legitimacy Within and Across Countries***

267 QCN's legitimacy is understood to be comprised of several types of interactions: political, normative, and  
268 cognitive. We first present our findings on political interactions, then normative interactions, and finally  
269 cognitive interactions, bearing in mind how the extent of the institutional interactions will depend on the  
270 capacity, beliefs, performance, purpose, procedures and authority of each organisation, it's wider  
271 organisational culture, and wider culture and political stability of the country (Figure 1). The presence (X) or  
272 absence (blank) of these types of interactions between the major institutions mentioned above, is  
273 summarized in Table 1, both for institutions within each country, and from the country to other countries in  
274 the network or the global level. All of these interactions drive (Figure 1) and reflect legitimacy of the QCN in  
275 each country, whilst for government ownership and embeddedness of the QCN in each country we are  
276 specifically interested in sharing of resources and transfer of concepts from the national level to other  
277 network countries or the global level of the network.

278

279 **Table 1: Types of institutional interactions observed in case study countries**

| Interaction type                                | Bangladesh     |                                                                    | Ethiopia       |                                                                  | Malawi         |                                                                | Uganda         |                                                                |
|-------------------------------------------------|----------------|--------------------------------------------------------------------|----------------|------------------------------------------------------------------|----------------|----------------------------------------------------------------|----------------|----------------------------------------------------------------|
|                                                 | Within country | Bangladesh to <sup>^</sup> other network countries or Global level | Within country | Ethiopia to <sup>^</sup> other network countries or Global level | Within country | Malawi to <sup>^</sup> other network countries or Global level | Within country | Uganda to <sup>^</sup> other network countries or Global level |
| <b>Political interactions</b>                   |                |                                                                    |                |                                                                  |                |                                                                |                |                                                                |
| - Collective decisions                          | X              | X                                                                  | X              | X                                                                | X              | X                                                              | X              | X                                                              |
| - Collaborative efforts                         | X              | X                                                                  | X              | X                                                                | X              | X                                                              | X              | X                                                              |
| - Resource Sharing <sup>^</sup>                 | X              |                                                                    | X              |                                                                  | X              |                                                                | X              |                                                                |
| <b>Normative interactions</b>                   |                |                                                                    |                |                                                                  |                |                                                                |                |                                                                |
| - Shared commitments                            | X              | X                                                                  |                | X                                                                |                | X                                                              | X              |                                                                |
| - Shared norms                                  | X              | X                                                                  |                |                                                                  |                |                                                                | X              |                                                                |
| - Common principles                             | X              | X                                                                  |                | X                                                                |                | X                                                              | X              | X                                                              |
| <b>Cognitive interactions</b>                   |                |                                                                    |                |                                                                  |                |                                                                |                |                                                                |
| - Exchange of information                       | X              | X                                                                  | X              |                                                                  | X              | X                                                              | X              |                                                                |
| - Transfer of concepts and methods <sup>^</sup> |                |                                                                    |                |                                                                  |                |                                                                |                |                                                                |

280 <sup>^</sup>For our analysis of government ownership and embeddedness of the QCN in each country we are specifically interested  
 281 in sharing of resources and transfer of concepts from the national level to other network countries or the global level of  
 282 the network

283

## 284 **Political Interaction**

285 The political institutional interactions we examined included those related to collective decisions,  
286 collaborative efforts, and resource sharing among key network partners across local, national and global  
287 levels. Political interactions between QCN institutions appeared strong in all four case study countries.

288

### 289 Collective Decisions

290 Collective decisions, evidenced by a Memorandum of Understanding (MoU) or joint statement for example,  
291 should be artifacts of any multi-stakeholder network [15] and both bolster and reflect legitimacy of the  
292 network. Collective decisions were observed at the global level as the network emerged, where all partners  
293 had an agreement with the WHO-based QCN secretariat regarding the formation of the network. This  
294 suggests QCN legitimacy is linked to legitimacy of the WHO.

295

296 At the national level, partners of all case countries working for QCN implementation, including those in the  
297 private sector, have contracts or longstanding bilateral arrangements with the MoH and with each other. The  
298 prior performance of partner organisations in each country –their history of contributing to quality  
299 improvement efforts– influenced their contribution to collective decisions.

300

301 Implementing partners in each country usually co-produced knowledge, guidance and gave statements on  
302 key issues with the MoH but were keen for the MoH to be seen as taking the lead and were in support roles  
303 of the ministry's strategic and operational direction.

304 *“In new districts, at first we have one to one interaction with leadership where we give some overview.*

305 *After that, we organized an inception meeting, all of the leaders attended that meeting, and through*  
306 *that process, we make them oriented as well as engaged with our activities.”* (Technical and

307 Implementing Partner – National level – Bangladesh Round 3)



308

309 In Bangladesh, QIS and other partner organizations attended the follow-up meeting with WHO QCN  
310 secretariat together and sent a narrative report and working plan to the WHO QCN secretariat, which was a  
311 good example of joint work. Another example of a collective decision was observed in Ethiopia in identifying  
312 partners and selecting learning sites by MoH and WHO in country, at the initial stage of QCN.

313 Autonomous decision-making persists along with coordination and collective decisions. For instance, in  
314 Uganda, partners took the autonomous decision during the selection of sites for scaling up. Bangladesh also  
315 experienced independent decision-making (e.g. selecting scaling up areas) and influence on MoH (e.g. joining  
316 the network, running capacity building activities by NIPSOM) in decision-making by the partners. The partners  
317 in Malawi also seem to have a lot of autonomy concerning decisions of which activities they will support and  
318 where. Similarly, Ethiopia also has the experience of autonomous decision-making on site selection since the  
319 selection of facilities was made based on partners existing support or pre-existing support by another project.

320

321 Collaborative efforts

322 Collaborative efforts include co-organizing events, co-coordinating activities, or co-authoring publications.  
323 Partners across global, national and local levels, and especially key national level partners in all four case  
324 study countries displayed strong collaborations. Cohesive participation in developing the forthcoming  
325 National Health Quality Strategy (NHQS) by all key partners at the national level in Bangladesh was observed  
326 for instance, though USAID was steering the strategy and communicating with different directorates as well  
327 as the WHO global network.

328

329 Developing QCN roadmaps in Ethiopia, Malawi and Uganda were the result of collaboration between QCN  
330 partners and in Uganda, this collaboration at the national level increased after MoH's leadership transition

331 which also made clear roles and responsibilities of the different units. Many respondents expressed their  
332 realization of the importance and benefit of QCN setting-up opportunities for collaboration.

333

334 Co-organizing different events, workshops and training were common across all study countries though the  
335 events were led by different partners depending on the topics. For example, in Bangladesh, national events  
336 were mostly led by government; they led in agenda setting and decision-making, and development partners  
337 supported technically and/or financially, so they could push the government to organize such types of  
338 collaborative events. Such financial and technical support to proceedings provided development partners  
339 authority to strategically influence QCN, though, as in Bangladesh, government often set the agenda and  
340 made the decisions on what was implemented and by which organizations. This was not always the case  
341 though. Two perspectives were observed regarding funding and decision-making in Malawi - influence of  
342 development partners in implementation and conditional funding, which is experienced through UNICEF, and  
343 reliance on partners for direction.

344 *".....we are hoping that partners like UNICEF, GIZ would come and say; 'okay, what will be our*  
345 *direction?'* This is because other than WHO, we need to engage other partners" (Government -  
346 National level - Malawi Round 3)

347

348 Sharing resources

349 At the global level, BMGF and USAID were the primary funding partners. BMGF primarily supported through  
350 funding the WHO-based QCN secretariat and UNICEF for national implementation. Later, BMGF did not fund  
351 network activities beyond the global secretariat which shrunk the implementation activities in UNICEF funded  
352 countries and spaces though they overcame this quickly through alternative funds. For instance, in  
353 Bangladesh, BMGF was the primary funder for the Kurigram project, while they also worked in 5-6 other  
354 districts with funding from Global Affairs Canada and the UN Emergency Fund for the Rohingya in Cox's

355 Bazaar. USAID funded QI efforts in-country via the MoMENTUM award, a global initiative covering 30  
356 countries including Bangladesh and Malawi (but not Ethiopia as MoMENTUM award was not running there  
357 and Uganda because of their own system) that will continue some of the QCN activities after QCN funding  
358 stops in 2022-2023 [26], with funding going directly to implementing partners rather than MoHs. Involvement  
359 of most funding partners in all four case countries was either via the continuation of previous QI efforts or  
360 MNCH activities, or via alignment with QCN activities (e.g., Mamoni project in Bangladesh). QI was also  
361 incorporated into pre-existing work, for example, World Bank/GFF supported funding for QI activities in  
362 Uganda, but they didn't really align themselves with QCN activities.

363  
364 Funding or sharing resources at the national and local levels is catalytic. In addition to receiving direct budget  
365 support from donors, it was common for partners in all four case study countries to mobilise their own  
366 resources, though the amount of resources varied across countries. Since there was no specific budget for  
367 QCN in Ethiopia, partners were using their own budgets earmarked for other similar QI activities to prepare  
368 learning sessions and support facilities. Big partners like USAID, UNICEF, WHO, Save the Children also  
369 provided human resources support through providing direct funding to the government or through  
370 implementing partners or by themselves at the national and/or facility level in all countries.

371 *"We provided funding to the government directly to hire additional human resources like officers*  
372 *for/located at the regional hospitals". (Technical and Implementing partner – National level -*  
373 *Uganda Round 1)*

374  
375 Except human resources support, partners also provided logistics and financial support and additionally, in  
376 some cases, support in the reconstruction and renovation of different facilities for MNH services across our  
377 four case countries. Pooling resources depended on necessity and on the ministry's request and/or facility  
378 manager's request. For example, in Ethiopia, rather than focusing solely on quality, all activities were

379 considered such as project design, implementation planning, and so on and when a need developed, such as  
380 when the government requests assistance or when gaps exist, donors such as UNICEF helped to fill those  
381 gaps, either in kind or cash. In Bangladesh and Malawi, partners also directly provided resources (e.g.,  
382 equipment) to learning sites. In Uganda, partners pool their resources at the national level for QCN activities  
383 but previous funding experiences and prevailing implementing partner working arrangements with MOH,  
384 including tight timelines and targets, led funders to prefer directly funding their own QI initiatives whilst  
385 ensuring alignment and reporting to MOH priorities.

386  
387 Domestic resources have been used for QCN activities in Ethiopia and Bangladesh in MoH or development  
388 partner's initiatives. In Ethiopia, MoH eventually shared some budget with the regions. However, having  
389 financial autonomy, some of the regions used the money for other purposes. On the other hand, one partner  
390 in Bangladesh succeeded to convince the National Institute of Local Government (NILG) to properly utilize  
391 their budget for MNH. Our meeting observation and interview showed that Save the Children succeeded to  
392 do it by engaging NLGI's in different events, like, advocacy meetings, establishing functional linkage between  
393 health and family planning departments and NLGIs, engaging them in data-driven decentralized planning and  
394 regular communication and follow-up. This helped to develop ownership by local government and  
395 contributed to sustainability. Such type of devolved funding was not observed in Malawi or Uganda. This  
396 suggests that the organizational and political culture of the MoH –their willingness to allow devolution or  
397 flexibility of funding– influences allocation of resources for QCN activities and reflects the extent to which  
398 the local level of QCN implementation was seen as legitimate by governments in each country.

399  
400 However, our interviews and observations indicate that resource allocation was not sufficient in most  
401 facilities to run QCN activities smoothly. In Uganda, there was a common theme that the global level of QCN  
402 did not consider the physical constraints or level of rapid resourcing needed from the government to be able

403 to achieve the goals and meet the standards, particularly around experience of care. A similar claim regarding  
404 organizational and structural capacity, came from respondents in Bangladesh.

405

## 406 **Normative Interaction**

407 The commitment, norms and principles of all QCN actors of all countries overlapped with national goals and  
408 were consistent with previous works that have been discussed in the background section. However, all  
409 agreed that network activities gave them more impetus to act and be accountable at global level. All the  
410 actors sought synergy though they didn't always experience synergy in terms of joint working on  
411 implementation and achievement of goals.

412

413 The governments of participating countries were leading the QCN through their commitment for improving  
414 quality of care and adaptation of the Network's strategic objectives to their country contexts through growing  
415 the partnership with the different organizations. All case study countries also adopted and adapted the QoC  
416 standards considering their own country context, led by MoH or the responsible department of MoH [11].  
417 Each country had exposure to QI activities through partners and mostly previous partners were working on  
418 network implementation. This was supposed to be beneficial, but this was not always the case. For instance,  
419 in Uganda, new coordination of actors was required as initial lack of clear coordination led to many  
420 participants reporting a lack of awareness or sense of cohesion. While participants at the national level were  
421 aware of and unified behind the QCN's goals, there was often a sense that each actor was continuing to  
422 operate in its predetermined silo at sub-national level. Another challenge in design for Uganda's in-country  
423 approach was that facility-level stakeholders, especially frontline workers were not fully oriented to the QCN  
424 separately; but rather some network activities were mainstreamed into other existing standard operating  
425 procedures, practice guidance or QI initiatives implemented by other implementing partners. A lack of a  
426 standardized implementation plan, including a clear set of timed targets, made it difficult to ensure alignment

427 and cohesion around QI at all levels of the network in Uganda. One MoH participant reflected that having  
428 clear, time-bound and measurable commitments would have increased motivation and momentum by  
429 encouraging accountability. However, this situation was not static: our last round of data indicated better  
430 coordination and leadership from the centre.

431  
432 Ethiopia experienced similar challenges throughout the entire implementation period. At the start of QCN,  
433 most of the actors in Ethiopia perceived network activities as WHO's work until the MoH announced it was  
434 their flagship initiative. In Ethiopia there was some disconnect between the federal and regional levels. The  
435 federal level and regional level blamed each other. The regional level complained that the central (federal)  
436 level didn't share anything or give clear direction, nor assign them with responsibilities properly, and that  
437 made them see the work as the federal level's project. On the contrary, the federal government was  
438 complaining about the regional level's lack of commitment whilst the regional level associated this with lack  
439 of capacity. In addition, regional level informants also mentioned they had a minimal sense of ownership.

440 *".....the MoH announced the QCN program in their own; they simply ask us to send them one or two*  
441 *participants in a meeting."* (Government-Regional level-Ethiopia Round 1)

442  
443 In the initial phases of QCN emergence, lack of coordination was also observed between the quality  
444 improvement and MCH departments of MOH. However, this was to improve later after a clear allocation of  
445 roles and responsibilities was undertaken. Lack of clear direction to the sub-national level was observed as a  
446 reason for slow inception of activities at local level in Malawi. Less concentration and poor political  
447 commitment of central level gradually made the RHD less active. Besides this, involvement of numerous  
448 partners, and persistence of discrepancies between the partners' and local objectives, created difficulties to  
449 coordinate and consolidate various efforts.

450

451 Evidence showed that implementation activities in Bangladesh were mostly ‘DP [Development Partner]  
452 centric’ despite the government chairing the QCN. Like the other three case study countries, awareness was  
453 mostly at central level, and the network was not known to most of the sub-national level actors who  
454 perceived the activities as partner’s work. This perception was, however, transformed progressively though  
455 not entirely, through meetings, workshops, and training organized by implementing partners, and when  
456 health workers at facilities started to comprehend the benefits.

457  
458 The above findings indicate that the beliefs of network actors about the purpose of QCN influence its  
459 legitimacy. This is exemplified at the local level, where the network was less well known by many health  
460 workers, and consequently had less authority.

461

## 462 **Cognitive Interaction**

463 It was expected in the network that all pathfinder countries will be willing to transparently share data within  
464 the network, have a desire to learn and develop, and that the international actors and countries will join to  
465 learn from one another. Good synergy was expected, but rarely materialized beyond sharing information  
466 through implementing-partner-led efforts. This may be due to lack of government capacity to assemble,  
467 manage, analyse and share information and adapt programming quickly in response, organizational cultures  
468 unused to such dynamic network-dependent decision-making, or both. Overall, the lack of transfer of ideas  
469 and concepts between institutions and countries involved in QCN illustrated limits to the network, and the  
470 embedding of QCN work in government health systems.

471

472 Exchange of information

473 Learning and sharing occurred between and within countries and at various levels: global, regional, national,  
474 sub-national, district, sub-district and facility level. Here, sub-national, district, and sub-district levels are

475 identified as local level (Figure 2). To continue the learning within country, district level learning networks  
476 were established in Bangladesh (in 2020) and Ethiopia (in 2019) [2]. A national level learning hub was also  
477 established in Bangladesh. QCN had a learning platform at global level and other methods of learning and  
478 sharing included: i) regular calls between partner countries and the QCN Technical Working Group (TWG)  
479 where countries share implementation progress and challenges, ii) a topical webinar series co-organized with  
480 partners, with a focus on sharing national level experience and know-how, and iii) in-person global level  
481 meetings where all global partners and network countries send delegations of eight to ten people [12].

482

483



484 **Figure 2 QCN learning and sharing methods at global, regional, national and local levels**

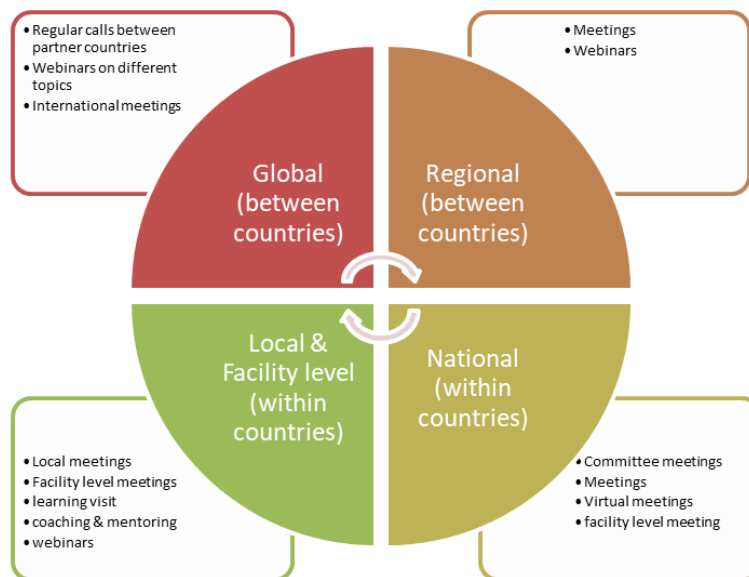

485

486

487 Exchange of information between countries was executed by all case study countries through regular calls  
488 and international meetings. From Bangladesh, TWG representatives attend the meetings. The QCN  
489 secretariat usually communicated with the focal person of development partners, and they coordinated and  
490 joined meetings along with the MoH. The MoH and development partners then shared updates on  
491 implementation activities in country with the QCN secretariat. In Uganda, the Ministry of Health and the  
492 WHO country office had weekly calls with the QCN global leadership and participate in network meetings,  
493 and their interaction increased and improved over our study period.

494

495 Of our four case study countries, Bangladesh and Malawi participated and shared experiences in different  
496 webinars initiated by the WHO QCN secretariat. MoH of Ethiopia and Uganda were initially reluctant to share  
497 at the global level though they agreed subsequently. In Bangladesh, development partners mostly  
498 coordinated it and included participants from local level also identified by them, with the consensus of the

499 MoH. However, the webinars were mostly “DP centric” as government stakeholders hardly attended. A  
500 national respondent in Bangladesh noted:

501 *“Yeah! It’s good but the government people don’t have the time to attend/participate in*  
502 *this meeting. They don’t want to talk, understand on this issue. So I think these are DP centric.”*

503 (Technical and Donor partner-National level-Bangladesh Round 4)

504  
505 Though the learning platform is appreciated by most stakeholders, global participants mostly benefited and  
506 few stakeholders at national or local level attended.

507  
508 All the partners including MoH, attended the global meetings, held during 2017–2019 before the COVID-19  
509 pandemic, and shared experiences [12]. Key development partners of Bangladesh also attended other global  
510 or regional meetings and webinars to share their methods, experiences and learning. Uganda also shared  
511 with neighbouring countries at the initial stage of QCN in their country.

512 Information exchange within countries was experienced by all countries in diverse ways and at both national  
513 and local levels. However, these meetings are mostly initiated and financed by implementing or technical  
514 partners, and dependent on their support. For example, facility level meetings in Malawi were initiated and  
515 financed by implementing partners, so stopped functioning for lack of resources when partners stopped  
516 supporting them. Shortage of budget and mistrust between the ministry and the regions affected regional  
517 level meetings in Ethiopia. In all four countries, the MoH also conducted national level sharing and learning  
518 meetings including large collaborative learning sessions, and implementing partners undertook district  
519 collaborative learning sessions and facility-based learning visits to learning facilities within and between  
520 districts.

521

522 QCN was structured in Bangladesh and Malawi using already established national, subnational and facility  
523 level committees. Many of these were inactive though and started to be functional (mostly at the facility  
524 level) due to support and continuous focus by implementing partners.

525  
526 Transfer of concepts and methods  
527 Some respondents talked about adapting lessons from Bangladesh by other countries, though there was no  
528 evidence of transfer of concepts or methods by the study sites, i.e., neither the case study countries adopted  
529 learning from other countries nor other countries adopted learning from these countries.

530 Within countries, no one discussed implementation or adaptation of learning from other partner's quality  
531 improvement methods; rather all the partners' implemented QCN activities following their own approaches,  
532 and often in separate geographical silos. In Uganda, different partners operated in different regions and used  
533 different specific tools dictated by their different funding mechanisms. In Malawi, partners continued to  
534 support the kind of activities they had been doing before the launch of the QCN, working in similar areas. In  
535 Ethiopia, all partners used their own approaches, for example, one partner provided coaching every month,  
536 and another provided district-based coaching every quarter. Another one went to the districts from the  
537 center.

538 *"Partners have their own interests; they all have different approaches that they follow. For*  
539 *example, we say learning collaborative should be prepared in three months. Some do it within six*  
540 *months. Some conduct coaching every month, the others do it quarterly. Therefore, it lacks*  
541 *uniformity."* (Government - National level - Ethiopia Round 1)

542  
543 The two key partners in Bangladesh were following two different approaches. However, at the initial stage  
544 of the study, one stakeholder of one development partner (UNICEF), mentioned about a cross learning  
545 process, where they have learned 5s-CQI-TQM from the other partner (Save the Children)'s previous planned

546 piloting area which was originally implemented by JICA Bangladesh. Similarly, the USAID team visited  
547 Kurigram as Kurigram was already established as a model district. A national respondent from Bangladesh  
548 noted:

549 *"Many [stakeholders] from different districts came to Kurigram including the whole USAID*  
550 *team.....they visited Kurigram before they started the Project. They observed the measurement*  
551 *system including other good system"* (Technical, Implementing and Donor partner - National level -  
552 Bangladesh Round 1)

553  
554 However, as our study progressed, no stakeholder talked about this type of visiting or learning. This may be  
555 due to a lack of embedding of such cross-learning in organizational cultures of institutions involved in QCN  
556 including the units of government ministries of health leading QCN in each country. Political instability, e.g.,  
557 in Ethiopia, and the COVID-19 pandemic –in all countries– may also have contributed to QCN being unable  
558 to achieve significant cross-learning.

559

## 560 Discussion

561 We found political interactions to be good in all four case study countries supporting the legitimacy of QCN.  
562 In particular, collective actions and collaborative efforts were present both within countries and between  
563 countries, and between countries and the global level (Table 1). Resource sharing between QCN stakeholder  
564 institutions was also found within all four case study countries, though not between countries. Nonetheless,  
565 the dependency on development partners and donors for resources limits the reach and depth of the  
566 network when their support is withdrawn and may also impinge on government authority to lead QCN-  
567 related work. In Bangladesh, the situation may be different as the next operational plan for quality should  
568 come with a separate government budget. Normative interactions including shared commitments and

569 norms, and common principles were also observed in each of the case study countries, apart from shared  
570 commitments in Ethiopia, where there was some tension between the central (federal) and regional levels.  
571 Normative interactions extended between network countries and between network countries and the global  
572 level as shared commitment to achieving the goals of QCN and commitment to the WHO quality of care  
573 standards used by QCN. This built on shared commitments to global goals on maternal, newborn and child  
574 health over the last two decades and the legitimacy of WHO as a co-ordinating, technical and normative body  
575 driving, underpinning, and representing the global maternal, newborn and child health agenda.

576  
577 In terms of cognitive interactions there was exchange of information within countries and between them,  
578 though bi-directional transfer of concepts and methods was more challenging and was generally absent  
579 within countries and between countries. Implementing partners typically implemented activities separately  
580 – using different concepts and methods, and in different geographical areas. This indicated the limits of  
581 government ownership of the QCN work and embeddedness of the network in that governments were not  
582 able to direct the work of the network to be cohesive. Specific activities were often determined by partners,  
583 differently in different areas dependent on which partner was operating where. Methods and concepts were  
584 not harmonised or synthesised and programmes of work often remained disparate and unconnected, despite  
585 the collaborative nature of the network and shared commitments indicated by the positive political and  
586 normative interactions. This lack of harmonisation and bi-directional transfer of concepts and methods may  
587 reflect lack of institutional capacity for this, or organisational culture not adapting to such new, networked,  
588 ways of operating. In many cases previous quality improvement efforts in the country, or district, and the  
589 partners that implemented them, shaped the specific work on quality for QCN.

590  
591 Leadership at multiple levels to motivate individuals and to drive systems and policy and coordinate partner  
592 actions was identified by respondents as one of the core themes to drive the network [16]. QCN was

593 frequently said to align well with government policy and to promote partner alignment across all network  
594 countries [16]. The leadership of QCN purposively identified and engaged NGOs that work on quality of care  
595 in each country, and globally. Having access to adequate physical resources, financing health care, and  
596 managing disruptive events all emerged as key drivers to network functionality [16].

597  
598 Though the network aimed to link actors at facility level together and to those at district, regional and  
599 national level, the periphery of the network was found to be weaker, have less power, and be less networked  
600 [13] and coordinated than the central level. Our stakeholder network analysis found QCN to be a multi-hub  
601 network with less connections between actors at the periphery, and most connections between the centre  
602 and the periphery [13]. We also found the online learning platform to be predominantly used by global  
603 stakeholders rather than those at the periphery of QCN [12] though those at district and facility levels were  
604 occasionally involved in collaborative learning sessions and learning visits. Actors at the periphery have  
605 limited power to change or improve local systems that are dependent on the central level (e.g., provision of  
606 human resources, procurement). The network did facilitate sharing of resources between partners and  
607 providers at local level though in some cases. However, state (MoH) actors at local and national levels lacked  
608 power to coordinate or pool such inputs. Together, these finding suggest that whilst the network was strong  
609 at global and national levels and useful for advocacy and sustaining the policy-profile of QCN objectives it did  
610 not often extend to influence day to day changes in practice at facility level. Organisational culture, and  
611 beliefs of network actors about the purpose of QCN may also have influenced its legitimacy, and consequent  
612 reach, at the local level.

613  
614 We found the presence or absence of political, normative and cognitive interactions and resultant relatively  
615 high legitimacy of QCN and relatively low ownership and embeddedness of the work by governments to be  
616 similar across Bangladesh, Ethiopia, Malawi and Uganda. There were a few notable differences though

617 including history of quality improvement in maternal, newborn and child health [10], different roles of  
618 different partners, and learning and sharing at the sub-national level. For example, the MoH in Ethiopia  
619 played an apparently leading role to run QCN activities and took the full leadership role since 2021 when  
620 WHO in country shrunk their activities in Ethiopia. Learning and sharing at sub-national level was experienced  
621 in Bangladesh more frequently than the other three countries.

622  
623 Prior work has looked at legitimacy of agenda setting and prioritising specific issues in global health, for  
624 example, non-communicable diseases [27]. Prior work has also looked at legitimacy of specific organisations  
625 working in global health, for example the World Health Organisation [28, 29], or Bill and Melinda Gates  
626 Foundation [30], and has looked at the power relations involved [3]. In this study we examine the legitimacy  
627 of an implementation-focused network (QCN). Drawing on prior work described in our methods section [4,  
628 8, 15, 17], we developed a framework to look at network legitimacy in terms of political, normative, and  
629 cognitive interactions between institutions involved in the network and determinants of the presence and  
630 strength of such interactions. We hope this framework may be useful in characterising the legitimacy of other  
631 implementation focused networks and the institutional interactions involved. The related concept of  
632 alignment may also be useful to consider going forwards as it has much in common with the concept of  
633 legitimacy. As described in a scoping review by Lundmark and colleagues [31], alignment has both structural  
634 (aligned plans and organisational structures) and social (cognitive, emotional and behaviour alignment of  
635 actors) dimensions and can be thought of as the process of creating a fit between inner and outer contexts  
636 of a system. Strategies to improve alignment include those pertaining to design and preparation,  
637 contextualisation, communication, motivation and evaluation of implementation efforts [31]. QCN has had  
638 some success so far in most of these areas [11, 26].

639

640 Recent work to develop a common understanding of networks of care reflects our findings by highlighting  
641 the importance of agreement, purposeful arrangements, buy-in and trusting relationships as enabling factors  
642 [32]. When assessing the results of applying their framework to consider the effectiveness of multi-  
643 stakeholder partnerships for renewable energy, Sanderink and Nasiritousi found that sharing of procedural  
644 information and coordination mechanisms were most fruitful, though care was needed to ensure such  
645 interactions didn't harm the autonomy or efficiency of multi-stakeholder partnerships [15]. Our separate  
646 investigation of the effectiveness of QCN [11], and investigation of the legitimacy and embeddedness of QCN  
647 in this paper, reflects this: we found leadership and coordination aspects of QCN to be particularly strong and  
648 effective [11], whilst in this paper we find government autonomy is needed to embed and sustain the work  
649 of QCN to improve quality of care.

650  
651 Key strengths of our study are the longitudinal iterative nature of the data collection over three years, the  
652 inclusion of four diverse case study countries and the global level of QCN, triangulation and synthesis of  
653 information between multiple methods including interviews, observations and document review, and use of  
654 recently developed frameworks that specifically consider drivers of legitimacy and different types of  
655 institutional interactions necessary for legitimacy and ownership of the work of QCN by country  
656 governments. Our study is therefore robust, though key limitations remain. Not all instances of absence of a  
657 particular type of interaction, e.g., absence of sharing resources between countries, was stated or  
658 corroborated by a wide range of respondents. Therefore, our findings, whilst likely to be broadly true, may  
659 lack some precision. We did not find large differences in perceived legitimacy and government ownership of  
660 QCN work between our four case study countries despite large divergence in both the extent to which QCN  
661 emerged in each of them [10] and in how effective QCN was in each of them [11]. It may be that the relatively  
662 high legitimacy and low ownership of the work of QCN that we found across Bangladesh, Ethiopia, Malawi



663 and Uganda is common to the other seven countries in QCN, or it may be that other countries had lower or  
664 higher legitimacy or ownership from the perspectives of their governments.

665  
666 The findings from this paper are useful as context for our assessments of the effectiveness of the network in  
667 delivering interventions and changing processes of care [11] and in understanding how it operates [33].  
668 Further research looking at legitimacy and ownership of the work of QCN, and networks of care more broadly  
669 [32], at district, health facility and community levels within countries will be useful to deepen understanding  
670 of what drives networks and how best to embed their work into routine systems and sustain them.

671

## 672 **Conclusion**

673 We found QCN legitimacy to be supported by shared commitments, norms and principles, developed from a  
674 long history of commitments to maternal, newborn and child health held in common, collective decision  
675 making, and collaborative activities. Encouraging pooling of resources and empowering peripheral levels may  
676 increase perceived legitimacy, and reach, of the network. Further work is required to develop government  
677 ownership of the work of QCN and embed it into routine systems. Enabling governments to synthesise and  
678 harmonise often diverse methods and approaches to quality improvement brought by different partner  
679 organisations, often working in different geographical areas, may be the key to this. Via such work  
680 governments may be able to embed processes to ensure higher quality of care for mothers, newborns and  
681 children across national, district and local health systems.

682

683

684

## 685 **Acknowledgement**

686 We thank all respondents and stakeholders for their time and contributions toward making this work  
687 possible. The QCN Evaluation Group is: Nehla Djellouli, Kasonde Mwaba, Callie Daniels-Howell, Tim Colbourn  
688 (UCL Institute for Global Health, UK), Kohenour Akter, Fatama Khatun, Mithun Sarker, Abdul Kuddus, Kishwar  
689 Azad (BADAS-PCP Bangladesh), Kondwani Mwandira, Albert Dube, Gladson Monjeza, Rachel Magaletta,  
690 Zabvuta Moffolo, Charles Makwenda (Parent and Child Health Initiative, Malawi), Mary Kinney, Fidele  
691 Mukinda (independent researchers, South Africa), Mike English (Oxford University), Yusra Shawar, Will  
692 Payne, Jeremy Shiffman (Johns Hopkins University, USA), Kathy Lubowa, Agnes Kyamulabi, Hilda Namakula,  
693 Gloria Seruwagi (Makerere University, Uganda), Anene Tesfa, Asebe Amenu, Theodros Getachew, Geremew  
694 Gonfa (Ethiopia Public Health Institute, Ethiopia), Seble Abreham, Tanya Marchant (LSHTM, UK)

695

## 696 **References**

- 697 1. The Network for Improving Quality of Care for Maternal Newborn and Child Health. Quality,  
698 Equity, Dignity. A Network for Improving Quality of Care for Maternal, Newborn and Child Health  
699 (see <http://www.qualityofcarenetwork.org/> (accessed 21 Dec 2022) for details) 2022.
- 700 2. World Health Organization. The Network For Improving Quality of Care for Maternal,  
701 Newborn, and Child Health. Evolution, Implementation and Progress. 2017-2020 Report. Geneva:  
702 WHO, 2021.
- 703 3. Shiffman J. Global Health as a Field of Power Relations: A Response to Recent Commentaries.  
704 International journal of health policy and management. 2015;4(7):497-9. doi:  
705 10.15171/ijhpm.2015.104. PubMed PMID: 26188819.
- 706 4. Tallberg J, Zürn M. The legitimacy and legitimation of international organizations:  
707 introduction and framework. The Review of International Organizations. 2019;14(4):581-606. doi:  
708 10.1007/s11558-018-9330-7.
- 709 5. Dellmuth LM, Tallberg J. Why national and international legitimacy beliefs are linked: Social  
710 trust as an antecedent factor. The Review of International Organizations. 2020;15(2):311-37. doi:  
711 10.1007/s11558-018-9339-y.
- 712 6. Rocabert J, Schimmelfennig F, Crasnic L, Winzen T. The rise of international parliamentary  
713 institutions: Purpose and legitimation. The Review of International Organizations. 2019;14(4):607-  
714 31. doi: 10.1007/s11558-018-9326-3.
- 715 7. Hooghe L, Lenz T, Marks G. Contested world order: The delegitimation of international  
716 governance. The Review of International Organizations. 2019;14(4):731-43. doi: 10.1007/s11558-  
717 018-9334-3.

- 718 8. Nasiritousi N, Faber H. Legitimacy under institutional complexity: Mapping stakeholder  
719 perceptions of legitimate institutions and their sources of legitimacy in global renewable energy  
720 governance. *Review of International Studies*. 2021;47(3):377-98. Epub 2020/12/14. doi:  
721 10.1017/S0260210520000431.
- 722 9. Vanyoro KP, Hawkins K, Greenall M, Parry H, Keeru L. Local ownership of health policy and  
723 systems research in low-income and middle-income countries: a missing element in the uptake  
724 debate. *BMJ global health*. 2019;4(4):e001523. doi: 10.1136/bmjgh-2019-001523.
- 725 10. Shawar Y, Djellouli N, Shiffman J, Akter K, Kinney MV, Mwaba K, et al. Factors Shaping  
726 Network Emergence: A Cross-Country Comparison of Quality of Care Networks in Bangladesh,  
727 Ethiopia, Malawi & Uganda. (under review). 2023.
- 728 11. Djellouli N, Shawar YR, Mwaba K, Akter K, Seruwagi G, Tufa AA, et al. Effectiveness of a multi-  
729 country implementation-focused network on quality of care: delivery of interventions and processes  
730 for improved maternal, newborn and child health outcomes *PLOS Global Public Health*. 2023;(under  
731 review).
- 732 12. Mwandira K, Lemma S, Akter K, Tufa AA, Kyambulani A, Nakkide C, et al. Do Networks  
733 facilitate innovation, learning and sharing? An evaluation of the Quality-of-Care Network (QCN) in  
734 Bangladesh, Ethiopia, Malawi, and Uganda. *PLOS Global Public Health*. 2023;(under review).
- 735 13. Mukinda FK, Djellouli N, Akter K, Sarker M, Tufa AA, Mwandira K, et al. Individual and  
736 organisational interactions, learning and information sharing in a multi-country implementation-  
737 focused quality of care network for maternal, newborn and child health: a stakeholder network  
738 analysis. *PLOS Global Public Health*. 2023;(under review).

- 739 14. Seruwagi G, Mwaba K, Tesfa A, Dube A, Mwandira K, Akter K, et al. How to evaluate a multi-  
740 country implementation-focused network: lessons from the Quality of Care Network (QCN)  
741 evaluation PLOS Global Public Health. 2023;(under review).
- 742 15. Sanderink L, Nasiritousi N. How institutional interactions can strengthen effectiveness: The  
743 case of multi-stakeholder partnerships for renewable energy. Energy Policy. 2020;141:111447. doi:  
744 <https://doi.org/10.1016/j.enpol.2020.111447>.
- 745 16. Tesfa A, Nakidde C, Akter K, Khatun F, Mwandira K, Lemma S, et al. Individual, organisational  
746 and system capacities, and the functioning of a multi-country implementation-focused network for  
747 maternal, newborn and child health: Bangladesh, Ethiopia, Malawi, and Uganda. PLOS Global Public  
748 Health. 2022;(under review).
- 749 17. Wu X, Ramesh M, Howlett M. Policy capacity: A conceptual framework for understanding  
750 policy competences and capabilities. Policy and Society. 2015;34(3):165-71. doi:  
751 <https://doi.org/10.1016/j.polsoc.2015.09.001>.
- 752 18. Braun V, Clarke V. Using thematic analysis in psychology. Qualitative Research in Psychology.  
753 2006;3(2):77-101. doi: 10.1191/1478088706qp063oa.
- 754 19. Collier D. Understanding process tracing. PS Polit Sci Polit. 2011;44:823-30.
- 755 20. Billah SM, Chowdhury MAK, Khan ANS, Karim F, Hassan A, Zaka N, et al. Quality of care during  
756 childbirth at public health facilities in Bangladesh: a cross-sectional study using WHO/UNICEF 'Every  
757 Mother Every Newborn (EMEN)' standards. BMJ Open Qual. 2019;8(3):e000596. Epub 2019/09/17.  
758 doi: 10.1136/bmjoq-2018-000596. PubMed PMID: 31523736; PubMed Central PMCID:  
759 PMC6711449.

- 760 21. USAID. USAID's MaMoni Maternal and Newborn Care Strengthening Project. Newsletter  
761 Volume 1 Issue 1 <https://mamoni.info/ViewKnowledge?id=1020> (accessed 9th Sep 2022). 2019.
- 762 22. Linnander E, McNatt Z, Sipsma H, Tatek D, Abebe Y, Endeshaw A, et al. Use of a national  
763 collaborative to improve hospital quality in a low-income setting. *International Health*.  
764 2016;8(2):148-53. doi: 10.1093/inthealth/ihv074.
- 765 23. Federal Democratic Republic of Ethiopia Ministry of Health. National MNH Quality of Care  
766 Roadmap (2017/18-2019/2020). International Institute for Primary Health Care, Ethiopia. Addis  
767 Ababa: MOH; 2017. Available from: <http://repository.iifphc.org/handle/123456789/738?show=full>.  
768 2017.
- 769 24. Sinunu MA, Schouten EJ, Wadonda-Kabondo N, Kajawo E, Eliya M, Moyo K, et al. Evaluating  
770 the Impact of Prevention of Mother-to-Child Transmission of HIV in Malawi through Immunization  
771 Clinic-Based Surveillance. *PLoS One*. 2014;9(6):e100741. doi: 10.1371/journal.pone.0100741.
- 772 25. The Republic of Uganda. 2013. Ministry of Health, A Promise Renewed. Reproductive,  
773 Maternal, Newborn and Child Health Sharpened Plan for Uganda.
- 774 26. Abreham SL, Daniels-Howell C, Tufa AA, Sarker M, Akter K, Nakkide C, et al. Opportunities to  
775 sustain a multi-country quality of care network: lessons on the actions of four countries Bangladesh,  
776 Ethiopia, Malawi, and Uganda. *PLOS Global Public Health*. 2023;(under review).
- 777 27. Jönsson K. Legitimation Challenges in Global Health Governance: The Case of Non-  
778 Communicable Diseases. *Globalizations*. 2014;11(3):301-14. doi: 10.1080/14747731.2013.876174.
- 779 28. Ruger JP. International institutional legitimacy and the World Health Organization. *Journal*  
780 *of Epidemiology and Community Health*. 2014;68(8):697. doi: 10.1136/jech-2013-203272.

- 781 29. Yang H. Contesting Legitimacy of Global Governance Institutions: The Case of the World  
782 Health Organization During the Coronavirus Pandemic. *International Studies Review*.  
783 2021;23(4):1813-34. doi: 10.1093/isr/viab047.
- 784 30. Harman S. The Bill and Melinda Gates Foundation and Legitimacy in Global Health  
785 Governance. *Global Governance: A Review of Multilateralism and International Organizations*.  
786 2016;22(3):349-68. doi: <https://doi.org/10.1163/19426720-02203004>.
- 787 31. Lundmark R, Hasson H, Richter A, Khachatryan E, Åkesson A, Eriksson L. Alignment in  
788 implementation of evidence-based interventions: a scoping review. *Implementation Science*.  
789 2021;16(1):93. doi: 10.1186/s13012-021-01160-w.
- 790 32. Carmone AE, Kalaris K, Leydon N, Sirivansanti N, Smith JM, Storey A, et al. Developing a  
791 Common Understanding of Networks of Care through a Scoping Study. *Health Systems & Reform*.  
792 2020;6(2):e1810921. doi: 10.1080/23288604.2020.1810921.
- 793 33. Dube A, Akter K, Khatun F, Abreham SL, Monjeza G, Seruwagi G, et al. Developing a theory  
794 of change to improve the functioning of The Network for Improving Quality of Care for Maternal,  
795 Newborn and Child Health. (in preparation). 2023.

796

797

798

799

800

801

## 802 **Figure captions**

803 **Fig 1. Framework describing drivers of legitimacy and ownership of the work of Quality of Care Network**

804 **(QCN) from the perspective of national governments leading the work of QCN**

805 **Fig 2. QCN learning and sharing methods at global, regional, national and local levels**

806

## 807 **Supporting Information**

808 **S1\_Text. PLOS GLOBAL HEALTH QCN Evaluation Collection 2-page summary.**

809 **S2\_Text. QCN papers common methods section.**

810 **S3\_Text. QCN papers common country context**



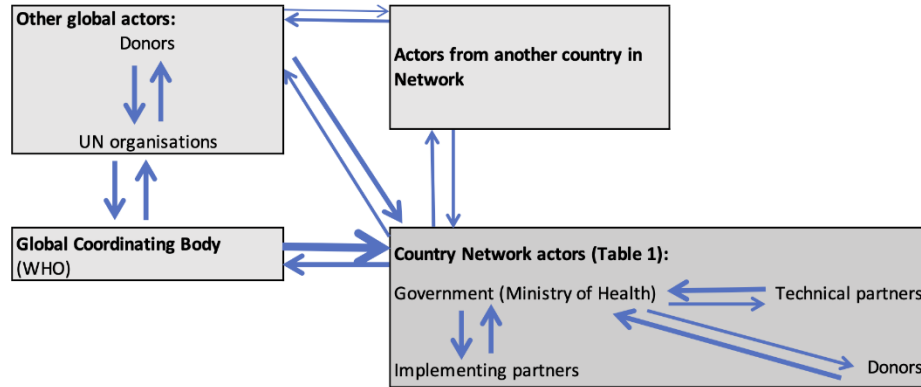

Arrows represent Institutional Interactions, including: [Sanderink & Nasiritousi \[5\]](#)

- Political Interactions
- Normative Interactions
- Cognitive Interactions

**Extent of influence of each body and actor (width of arrow) will depend on:**

- Capacity [see Wu et al, ref XX, Paper 6, ref XX] e.g. Human resources available in country to draft policy and programmes, organise activities, analyse and evaluate processes and outcomes
- Alignment of goals between actors (**beliefs**, organisational **purpose**)
- Leverage (**authority**) via other agreements and influences, and **procedures**
- Organisational culture and wider cultures
- Political stability
- **Performance** of organisations

[Nasiritousi & Faber \[6\]](#)

[Tallberg & Zurn \[Ref X\]](#)

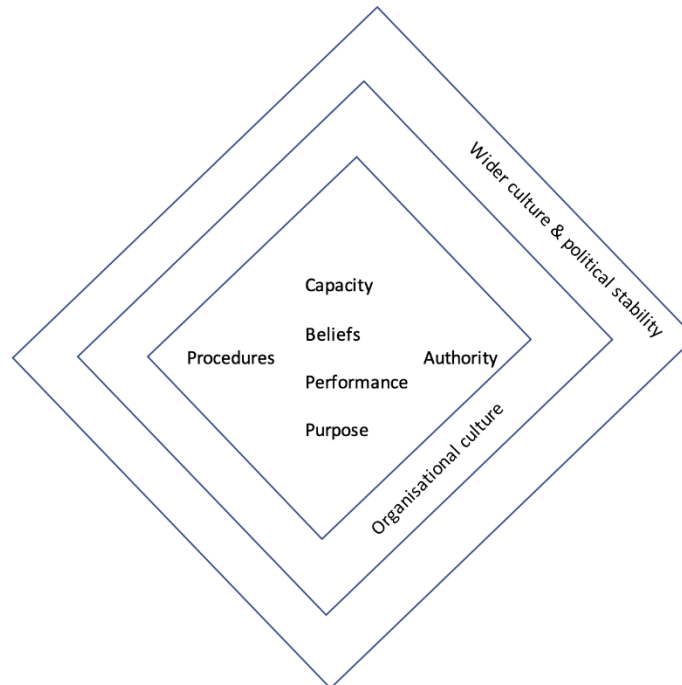

Paper 2

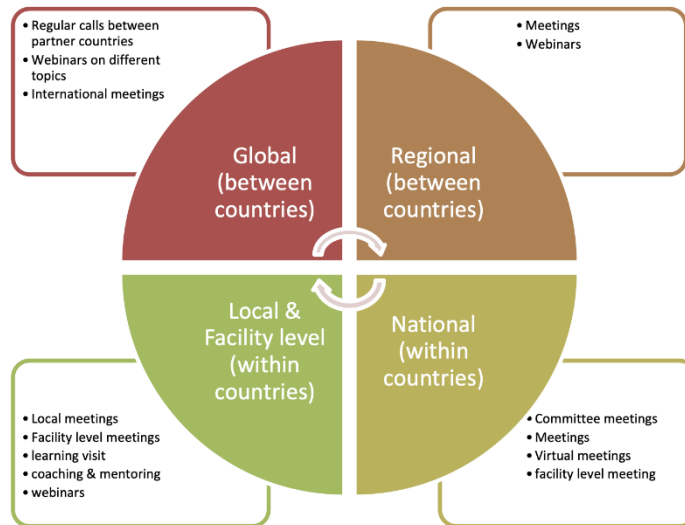

Source: https://medrxiv.org/content/10.1101/2023.03.06.23286634v1.full.pdf
